# Supplementary material
Source: MDPI journal article supplement (https://www.mdpi.com/1999-4907/14/10/2083)
Supplement: s1 [file s1]

**Table S1.** Site location, subplot code, and GPS coordinates for each sampling plot. W8 = Winston 8 Land and Cattle Tree Farm; ANF = Angelina National Forest; DCNF = Davy Crockett National Forest.

| Site Location | Sub-Plot Code | Latitude  | Longitude  |
|---------------|---------------|-----------|------------|
| DCNF          | 19            | 31.557650 | -95.164706 |
| DCNF          | 19-2          | 31.557674 | -95.165070 |
| ANF           | 66.01         | 31.143155 | -94.337276 |
| ANF           | 66.01-2       | 31.142935 | -94.337451 |
| ANF           | 66.02         | 31.143159 | -94.338407 |
| ANF           | 66.02-2       | 31.143163 | -94.338073 |
| ANF           | 67.02         | 31.146366 | -94.350587 |
| ANF           | 67.02-2       | 31.146049 | -94.350452 |
| W8            | W01           | 31.510600 | -94.719893 |
| W8            | W01-1         | 31.510487 | -94.720059 |
| W8            | W02           | 31.508886 | -94.719574 |
| W8            | W02-1         | 31.508764 | -94.719721 |
| W8            | W03           | 31.506644 | -94.719835 |
| W8            | W03-1         | 31.506842 | -94.719789 |
| W8            | W04           | 31.501833 | -94.720773 |
| W8            | W04-1         | 31.501936 | -94.720595 |
| W8            | W05.1         | 31.499962 | -94.720910 |
| W8            | W05.1-1       | 31.500002 | -94.721071 |
| W8            | W5            | 31.507570 | -94.719086 |
| W8            | W5-1          | 31.507749 | -94.719333 |
| W8            | W7            | 31.510930 | -94.717413 |
| W8            | W7-1          | 31.513396 | -94.717528 |
| W8            | W8            | 31.508660 | -94.717010 |
| W8            | W8-1          | 31.508419 | -94.717083 |
| W8            | W11           | 31.509117 | -94.710175 |
| W8            | W11-1         | 31.509008 | -94.710245 |
| W8            | W12           | 31.508924 | -94.709120 |
| W8            | W12-1         | 31.508819 | -94.708880 |
| W8            | W13           | 31.510535 | -94.710096 |
| W8            | W13-1         | 31.510437 | -94.709962 |
| W8            | W14           | 31.511139 | -94.709232 |
| W8            | W14-1         | 31.510971 | -94.709108 |
| W8            | W15           | 31.510659 | -94.707995 |
| W8            | W15-1         | 31.510727 | -94.708101 |
| W8            | W16           | 31.508251 | -94.710421 |
| W8            | W16-1         | 31.508113 | -94.710509 |
| W8            | W17           | 31.506903 | -94.710493 |
| W8            | W17-1         | 31.506788 | -94.710293 |

**Table S2.** Soil map unit and upper 15 cm soil texture associated with each subplot. W8 = Winston 8 Land and Cattle Tree Farm; ANF = Angelina National Forest; DCNF =Davy Crockett National Forest. NRCS reported soil water infiltration rates measured in cm min<sup>-1</sup>. NRCSIR = Natural Resource Conservation Service Infiltration Rates.

| Location | Sub-plot | Map Unit | Soi Texture | Soil Series Description                                        | NRCSIR |
|----------|----------|----------|-------------|----------------------------------------------------------------|--------|
| DCNF     | 19.01    | Darco    | Sand        | Loamy, siliceous, semiactive, thermic Grossarenic Paleudults   | 0.55   |
| DCNF     | 19.01-2  | Darco    | Sand        | Loamy, siliceous, semiactive, thermic Grossarenic Paleudults   | 0.55   |
| ANF      | 66.01    | Alazan   | Loamy Sand  | Fine-loamy, siliceous, semiactive, thermic Aquic Glossudalfs   | 0.17   |
| ANF      | 66.01-2  | Alazan   | Sand        | Fine-loamy, siliceous, semiactive, thermic Aquic Glossudalfs   | 0.17   |
| ANF      | 66.02    | Alazan   | Loamy Sand  | Fine-loamy, siliceous, semiactive, thermic Aquic Glossudalfs   | 0.17   |
| ANF      | 66.02-2  | Alazan   | Sand        | Fine-loamy, siliceous, semiactive, thermic Aquic Glossudalfs   | 0.17   |
| ANF      | 67.02    | Moswell  | Loamy Sand  | Very-fine, smectitic, thermic Vertie Hapludalfs                | 0.05   |
| ANF      | 67.02-2  | Moswell  | Sand        | Very-fine, smectitic, thermic Vertie Hapludalfs                | 0.05   |
| W8       | W01      | Kirvin   | Sand        | Fine, mixed, semiactive, thermic Typic Hapludults              | 0.17   |
| W8       | W01-1    | Kirvin   | Sand        | Fine, mixed, semiactive, thermic Typic Hapludults              | 0.17   |
| W8       | W02      | Bowie    | Sand        | Fine-loamy, siliceous, semiactive, thermic Plinthic Paleudults | 0.17   |
| W8       | W02-1    | Bowie    | Sand        | Fine-loamy, siliceous, semiactive, thermic Plinthic Paleudults | 0.17   |
| W8       | W03      | Bowie    | Sand        | Fine-loamy, siliceous, semiactive, thermic Plinthic Paleudults | 0.17   |
| W8       | W03-1    | Bowie    | loamy Sand  | Fine-loamy, siliceous, semiactive, thermic Plinthic            | 0.17   |

|    |         |           |            |                                                                |      |
|----|---------|-----------|------------|----------------------------------------------------------------|------|
|    |         |           |            | Paleudults                                                     |      |
| W8 | W04     | Kirvin    | Sand       | Fine, mixed, semiactive, thermic Typic Hapludults              | 0.17 |
| W8 | W04-1   | Kirvin    | Sand       | Fine, mixed, semiactive, thermic Typic Hapludults              | 0.17 |
| W8 | W05.1   | Bernaldo  | Sand       | Fine-loamy, siliceous, semiactive, thermic Glossic Paleudalfs  | 0.17 |
| W8 | W05.1-1 | Bernaldo  | Sand       | Fine-loamy, siliceous, semiactive, thermic Glossic Paleudalfs  | 0.17 |
| W8 | W5      | Bowie     | Loamy Sand | Fine-loamy, siliceous, semiactive, thermic Plinthic Paleudults | 0.17 |
| W8 | W5-1    | Bowie     | Loamy Sand | Fine-loamy, siliceous, semiactive, thermic Plinthic Paleudults | 0.17 |
| W8 | W7      | Culthbert | Sand       | Fine, mixed, semiactive, thermic Typic Hapludults              | 0.17 |
| W8 | W7-1    | Culthbert | Sand       | Fine, mixed, semiactive, thermic Typic Hapludults              | 0.17 |
| W8 | W8      | Bernaldo  | Sand       | Fine-loamy, siliceous, semiactive, thermic Glossic Paleudalfs  | 0.17 |
| W8 | W8-1    | Bernaldo  | Loamy Sand | Fine-loamy, siliceous, semiactive, thermic Glossic Paleudalfs  | 0.17 |
| W8 | W11     | Darco     | Loamy Sand | Loamy, siliceous, semiactive, thermic Grossarenic Paleudults   | 0.55 |
| W8 | W11-1   | Bowie     | Loamy Sand | Fine-loamy, siliceous, semiactive, thermic Plinthic Paleudults | 0.17 |
| W8 | W12     | Tenaha    | Sand       | Loamy, siliceous, semiactive, thermic Arenic Hapludults        | 0.55 |
| W8 | W12-1   | Tenaha    | Sand       | Loamy, siliceous, semiactive, thermic Arenic Hapludults        | 0.55 |
| W8 | W13     | Tenaha    | Sand       | Loamy, siliceous, semiactive, thermic Arenic Hapludults        | 0.55 |

|    |       |        |            |                                                              |      |
|----|-------|--------|------------|--------------------------------------------------------------|------|
| W8 | W13-1 | Tenaha | Sand       | Loamy, siliceous, semiactive, thermic Arenic Hapludults      | 0.55 |
| W8 | W14   | Tenaha | Sand       | Loamy, siliceous, semiactive, thermic Arenic Hapludults      | 0.55 |
| W8 | W14-1 | Darco  | Sand       | Loamy, siliceous, semiactive, thermic Grossarenic Paleudults | 0.55 |
| W8 | W15   | Tenaha | Sand       | Loamy, siliceous, semiactive, thermic Arenic Hapludults      | 0.55 |
| W8 | W15-1 | Tenaha | Sand       | Loamy, siliceous, semiactive, thermic Arenic Hapludults      | 0.55 |
| W8 | W16   | Darco  | Sand       | Loamy, siliceous, semiactive, thermic Grossarenic Paleudults | 0.55 |
| W8 | W16-1 | Darco  | Loamy Sand | Loamy, siliceous, semiactive, thermic Grossarenic Paleudults | 0.55 |
| W8 | W17   | Tenaha | Sand       | Loamy, siliceous, semiactive, thermic Arenic Hapludults      | 0.55 |
| W8 | W17-1 | Tenaha | Sand       | Loamy, siliceous, semiactive, thermic Arenic Hapludult       | 0.55 |

---

**Table S3.** Soil water infiltration rates (cm min<sup>-1</sup>) at the three time frames and with means.

| Location | Sub-Plot | Pre-Burn | Post-Burn | Green-Up | Mean Infiltration |
|----------|----------|----------|-----------|----------|-------------------|
| DCNF     | 19.01    | 3.17     | 3.33      | 4.00     | 3.50              |
| DCNF     | 19.01-2  | 3.33     | 4.50      | 5.67     | 4.50              |
| ANF      | 66.01    | 0.43     | 0.60      | 0.75     | 0.59              |
| ANF      | 66.01-2  | 1.00     | 0.80      | 0.69     | 0.83              |
| ANF      | 66.02    | 1.60     | 3.50      | 3.50     | 2.87              |
| ANF      | 66.02-2  | 1.50     | 1.83      | 0.75     | 1.36              |
| ANF      | 67.02    | 3.00     | 1.40      | 1.63     | 2.01              |
| ANF      | 67.02-2  | 1.70     | 7.00      | 2.50     | 3.73              |
| W8       | W01      | 0.93     | 2.17      | 1.63     | 1.57              |
| W8       | W01-1    | 0.79     | 1.30      | 1.63     | 1.24              |
| W8       | W02      | 3.00     | 0.55      | 1.50     | 1.68              |
| W8       | W02-1    | 1.38     | 1.10      | 1.20     | 1.23              |
| W8       | W03      | 0.65     | 0.60      | 1.38     | 0.88              |
| W8       | W03-1    | 1.20     | 0.60      | 1.50     | 1.10              |
| W8       | W04      | 1.60     | 0.60      | 0.86     | 1.02              |
| W8       | W04-1    | 1.10     | 1.10      | 1.25     | 1.15              |
| W8       | W05.1    | 3.00     | 0.65      | 1.75     | 1.80              |
| W8       | W05.1-1  | 1.30     | 0.65      | 1.50     | 1.15              |
| W8       | W5       | 0.34     | 1.00      | 1.50     | 0.95              |
| W8       | W5-1     | 0.75     | 1.30      | 1.83     | 1.29              |
| W8       | W7       | 3.00     | 5.00      | 2.20     | 3.40              |
| W8       | W7-1     | 1.40     | 0.39      | 1.83     | 1.21              |
| W8       | W8       | 0.55     | 0.69      | 1.83     | 1.02              |
| W8       | W8-1     | 1.50     | 2.75      | 2.17     | 2.14              |
| W8       | W11      | 2.00     | 1.67      | 2.75     | 2.14              |
| W8       | W11-1    | 2.80     | 3.00      | 1.83     | 2.54              |
| W8       | W12      | 2.33     | 6.00      | 8.00     | 5.44              |
| W8       | W12-1    | 1.38     | 2.75      | 13.00    | 5.71              |
| W8       | W13      | 2.33     | 2.75      | 1.75     | 2.28              |
| W8       | W13-1    | 1.63     | 6.50      | 2.50     | 3.54              |
| W8       | W14      | 5.25     | 4.50      | 7.50     | 5.75              |
| W8       | W14-1    | 2.67     | 8.00      | 6.00     | 5.56              |
| W8       | W15      | 2.60     | 2.75      | 2.75     | 2.70              |
| W8       | W15-1    | 1.50     | 2.75      | 7.50     | 3.92              |
| W8       | W16      | 2.00     | 3.00      | 3.75     | 2.92              |
| W8       | W16-1    | 3.25     | 7.00      | 2.75     | 4.33              |
| W8       | W17      | 2.17     | 3.00      | 3.50     | 2.89              |
| W8       | W17-1    | 2.17     | 3.00      | 2.50     | 2.56              |
| Mean     | Rate     |          | 1.90      | 2.63     | 2.92              |

**Table S4.** Soil bulk density (Mg m<sup>-3</sup>), Particle density (Mg m<sup>-3</sup>), Particle Volume (ml<sup>3</sup>), and Pore space percentage (%) for each subplot and each time frame. Pre= Pre-burn; Post= Post burn; G = Green-up.

| Subplot | <u>Bulk Density</u><br>(Mg m <sup>-3</sup> ) |      |      | <u>Particle density</u><br>(Mg m <sup>-3</sup> ) |      |      | <u>Particle volume</u><br>(ml <sup>3</sup> ) |      |     | <u>Pore Space</u><br>(%) |      |      |
|---------|----------------------------------------------|------|------|--------------------------------------------------|------|------|----------------------------------------------|------|-----|--------------------------|------|------|
|         | Pre                                          | Post | G    | Pre                                              | Post | G    | Pre                                          | Post | G   | Pre                      | Post | G    |
| 66.01   | 1.19                                         | 0.87 | 0.99 | 2.20                                             | 1.97 | 2.47 | 270                                          | 220  | 80  | 46.0                     | 56.0 | 60.0 |
| 66.01-2 | 1.19                                         | 1.64 | 1.59 | 2.15                                             | 2.09 | 1.99 | 240                                          | 340  | 200 | 44.7                     | 21.7 | 20.0 |
| 66.02   | 1.07                                         | 1.32 | 1.73 | 2.06                                             | 2.07 | 2.06 | 260                                          | 320  | 210 | 48.0                     | 36.0 | 16.0 |
| 66.02-2 | 1.98                                         | 1.32 | 1.41 | 2.16                                             | 1.96 | 1.82 | 340                                          | 250  | 170 | 8.1                      | 32.4 | 22.7 |
| 67.02-1 | 1.55                                         | 1.48 | 1.33 | 2.20                                             | 2.04 | 2.22 | 290                                          | 300  | 150 | 29.6                     | 27.2 | 40.0 |
| 67.02-2 | 0.95                                         | 1.21 | 0.93 | 1.96                                             | 1.95 | 1.93 | 210                                          | 270  | 120 | 51.6                     | 37.8 | 52.0 |
| 19.01   | 1.41                                         | 0.86 | 1.00 | 2.52                                             | 2.20 | 2.51 | 260                                          | 240  | 200 | 43.9                     | 60.7 | 60.0 |
| 19.01-2 | 1.37                                         | 1.05 | 1.30 | 2.48                                             | 2.31 | 2.13 | 210                                          | 340  | 270 | 44.7                     | 54.7 | 39.2 |
| W01     | 1.36                                         | 1.59 | 1.06 | 2.32                                             | 2.34 | 2.05 | 200                                          | 340  | 340 | 41.2                     | 32.0 | 48.0 |
| W01-1   | 1.59                                         | 1.80 | 1.05 | 2.41                                             | 2.16 | 2.40 | 330                                          | 350  | 260 | 34.0                     | 16.7 | 56.5 |
| W02     | 1.25                                         | 1.27 | 0.88 | 2.12                                             | 2.24 | 1.95 | 260                                          | 240  | 180 | 41.2                     | 43.1 | 55.0 |
| W02-1   | 1.42                                         | 1.40 | 1.11 | 2.26                                             | 2.37 | 1.80 | 240                                          | 260  | 210 | 37.2                     | 40.9 | 38.2 |
| W03     | 1.42                                         | 0.91 | 1.19 | 2.39                                             | 1.42 | 2.24 | 250                                          | 320  | 260 | 40.5                     | 36.0 | 46.7 |
| W03-1   | 1.31                                         | 1.47 | 1.11 | 2.24                                             | 2.17 | 2.16 | 210                                          | 340  | 280 | 41.7                     | 32.0 | 48.7 |
| W04     | 1.08                                         | 1.01 | 1.15 | 2.17                                             | 1.97 | 2.41 | 220                                          | 240  | 240 | 50.0                     | 48.9 | 52.0 |
| W04-1   | 1.15                                         | 1.41 | 1.06 | 1.97                                             | 2.34 | 2.23 | 320                                          | 300  | 320 | 41.8                     | 40.0 | 52.2 |
| W05.1   | 1.48                                         | 1.31 | 1.05 | 2.17                                             | 2.11 | 2.21 | 260                                          | 310  | 300 | 31.6                     | 38.0 | 52.5 |
| W05.1-1 | 1.47                                         | 1.04 | 1.03 | 2.11                                             | 2.25 | 2.19 | 320                                          | 300  | 220 | 30.4                     | 53.7 | 52.8 |
| W5      | 1.56                                         | 1.67 | 1.27 | 2.30                                             | 2.26 | 2.10 | 240                                          | 370  | 270 | 32.2                     | 26.0 | 39.6 |
| W5-1    | 1.36                                         | 1.15 | 1.53 | 2.13                                             | 2.20 | 2.47 | 320                                          | 340  | 280 | 36.0                     | 47.7 | 38.1 |
| W7      | 1.25                                         | 0.95 | 1.22 | 2.13                                             | 2.11 | 2.20 | 230                                          | 180  | 210 | 41.3                     | 54.8 | 44.7 |
| W7-1    | 1.54                                         | 1.75 | 1.66 | 2.37                                             | 2.31 | 2.43 | 200                                          | 280  | 220 | 35.1                     | 24.3 | 31.7 |
| W8      | 1.25                                         | 1.45 | 0.90 | 2.21                                             | 2.19 | 1.95 | 260                                          | 380  | 200 | 43.5                     | 33.8 | 53.9 |
| W8-1    | 1.19                                         | 0.89 | 1.15 | 2.06                                             | 2.10 | 1.88 | 260                                          | 190  | 290 | 42.2                     | 57.8 | 38.8 |
| W11     | 1.36                                         | 1.34 | 1.14 | 2.27                                             | 2.19 | 1.84 | 300                                          | 280  | 260 | 40.0                     | 38.9 | 38.4 |
| W11-1   | 1.20                                         | 1.50 | 1.30 | 2.28                                             | 2.01 | 2.17 | 260                                          | 300  | 300 | 47.5                     | 25.4 | 40.0 |
| W12     | 1.13                                         | 1.43 | 0.82 | 2.18                                             | 2.08 | 0.87 | 260                                          | 280  | 200 | 48.0                     | 31.0 | 4.76 |
| W12-1   | 1.34                                         | 1.58 | 0.95 | 2.29                                             | 2.58 | 2.30 | 200                                          | 280  | 70  | 41.5                     | 38.9 | 58.8 |
| W13     | 1.36                                         | 1.35 | 1.08 | 1.76                                             | 2.25 | 2.25 | 300                                          | 300  | 120 | 22.7                     | 40.0 | 52.0 |
| W13-1   | 1.25                                         | 1.16 | 0.90 | 2.10                                             | 1.58 | 2.05 | 220                                          | 360  | 110 | 40.5                     | 26.5 | 56.0 |
| W14     | 1.15                                         | 1.18 | 1.05 | 2.04                                             | 1.48 | 2.38 | 220                                          | 400  | 220 | 43.6                     | 20.0 | 56.0 |
| W14-1   | 1.05                                         | 1.07 | 1.89 | 2.05                                             | 2.42 | 2.31 | 190                                          | 210  | 360 | 48.9                     | 55.5 | 18.2 |
| W15     | 1.17                                         | 1.34 | 1.47 | 2.41                                             | 2.40 | 2.22 | 200                                          | 280  | 300 | 51.5                     | 44.0 | 33.9 |
| W15-1   | 1.21                                         | 1.48 | 1.10 | 1.90                                             | 2.17 | 1.82 | 160                                          | 340  | 200 | 36.0                     | 32.0 | 39.4 |
| W16     | 1.27                                         | 1.40 | 1.25 | 2.26                                             | 2.22 | 2.50 | 140                                          | 280  | 60  | 44.0                     | 36.9 | 50.0 |
| W16-1   | 1.38                                         | 1.15 | 1.21 | 2.20                                             | 1.91 | 1.96 | 230                                          | 300  | 80  | 37.2                     | 40.0 | 38.5 |
| W17     | 1.33                                         | 1.42 | 1.48 | 2.55                                             | 2.28 | 2.52 | 160                                          | 240  | 270 | 48.1                     | 37.8 | 41.3 |
| W17-1   | 1.33                                         | 1.41 | 1.33 | 1.85                                             | 2.49 | 2.38 | 230                                          | 220  | 280 | 28.1                     | 43.6 | 44.0 |

**Table S5.** Total, 2 mm, 1 mm, 0.5 mm and 0.25 mm (g) % of water stable soil aggregates (g) for each time frame. Pre= Pre-burn; Post= Post burn; Green = Green-up.

|         | Total |       |      | 2 mm |      |      | 1 mm |      |      | 0.5 mm |      |      | 0.25 mm |      |      |
|---------|-------|-------|------|------|------|------|------|------|------|--------|------|------|---------|------|------|
| Subplot | Pre   | Post  | G    | Pre  | Post | G    | Pre  | Post | G    | Pre    | Post | G    | Pre     | Post | G    |
| 66.01   | 66.4  | 83.3  | 73.8 | 52.8 | 80.8 | 64.5 | 3.5  | 1.1  | 2.9  | 1.9    | 0.6  | 2.6  | 1.9     | 0.6  | 2.6  |
| 66.01-2 | 77.4  | 60.4  | 80.9 | 71.8 | 53.8 | 73.7 | 1.7  | 3.4  | 1.8  | 1.6    | 1.2  | 0.6  | 1.6     | 1.2  | 0.6  |
| 66.02   | 89.6  | 78.7  | 67.2 | 74.1 | 76.3 | 63.6 | 6.8  | 0.9  | 1.8  | 4.5    | 0.5  | 0.8  | 4.5     | 0.5  | 0.8  |
| 66.02-2 | 72.9  | 86.3  | 65.0 | 62.1 | 84.3 | 61.5 | 3.5  | 1.3  | 1.7  | 2.2    | 0.1  | 0.7  | 2.2     | 0.1  | 0.7  |
| 67.02-1 | 98.6  | 83.0  | 76.9 | 90.4 | 72.1 | 74.6 | 3.3  | 2.2  | 1.2  | 2.1    | 2.4  | 0.7  | 2.1     | 2.4  | 0.7  |
| 67.02-2 | 78.8  | 75.1  | 72.4 | 69.3 | 67.7 | 58.2 | 4.8  | 3.5  | 11.0 | 3.2    | 2.0  | 1.8  | 3.2     | 2.0  | 1.8  |
| 19.01   | 92.2  | 90.3  | 87.9 | 51.5 | 24.2 | 31.2 | 2.4  | 3.5  | 4.5  | 10.1   | 14.6 | 31.9 | 10.1    | 14.6 | 31.9 |
| 19.01-2 | 90.2  | 117.8 | 88.2 | 27.0 | 39.1 | 29.5 | 7.4  | 3.2  | 5.4  | 32.4   | 62.0 | 29.2 | 32.4    | 62.0 | 29.4 |
| W01     | 69.6  | 82.1  | 85.9 | 46.6 | 60.4 | 54.7 | 2.7  | 3.5  | 6.0  | 2.1    | 1.9  | 3.7  | 2.1     | 1.9  | 3.7  |
| W01-1   | 74.5  | 76.4  | 80.4 | 59.7 | 54.0 | 49.5 | 2.9  | 3.2  | 4.4  | 0.9    | 2.1  | 3.3  | 0.9     | 2.1  | 3.3  |
| W02     | 85.6  | 82.0  | 82.0 | 57.2 | 40.1 | 31.6 | 11.4 | 14.0 | 9.1  | 7.4    | 9.0  | 9.8  | 7.4     | 9.0  | 9.8  |
| W02-1   | 82.3  | 95.6  | 91.2 | 71.3 | 59.6 | 39.3 | 3.9  | 16.4 | 15.4 | 2.9    | 13.4 | 31.2 | 2.9     | 13.4 | 31.2 |
| W03     | 71.9  | 77.9  | 79.2 | 49.6 | 65.9 | 64.3 | 7.5  | 5.1  | 5.6  | 3.0    | 3.5  | 3.6  | 3.0     | 3.5  | 3.6  |
| W03-1   | 61.3  | 84.9  | 77.4 | 40.6 | 57.8 | 56.7 | 5.3  | 9.6  | 5.8  | 1.9    | 5.8  | 3.5  | 1.9     | 5.8  | 3.5  |
| W04     | 83.1  | 87.7  | 90.0 | 66.7 | 50.4 | 74.9 | 5.5  | 13.3 | 4.1  | 3.6    | 8.8  | 2.6  | 3.6     | 8.8  | 2.5  |
| W04-1   | 81.4  | 108.6 | 83.7 | 56.3 | 50.7 | 43.9 | 8.4  | 16.9 | 12.3 | 7.2    | 9.9  | 7.7  | 7.2     | 9.9  | 7.7  |
| W05.1   | 82.0  | 89.3  | 90.0 | 52.5 | 51.1 | 63.5 | 5.1  | 6.3  | 3.7  | 3.6    | 9.7  | 3.8  | 3.4     | 9.7  | 3.8  |
| W05.1-1 | 74.3  | 88.9  | 86.1 | 56.1 | 31.6 | 36.8 | 2.0  | 20.0 | 5.9  | 1.8    | 28.3 | 3.0  | 1.8     | 28.3 | 3.0  |

|              |          |      |          |      |          |      |     |          |          |          |          |          |          |          |          |
|--------------|----------|------|----------|------|----------|------|-----|----------|----------|----------|----------|----------|----------|----------|----------|
| <b>W5</b>    | 67.<br>4 | 68.0 | 83.<br>2 | 49.3 | 48.<br>9 | 56.2 | 5.8 | 5.1      | 4.6      | 4.3      | 3.1      | 4.3      | 4.3      | 3.1      | 4.3      |
| <b>W5-1</b>  | 78.<br>1 | 95.3 | 95.<br>8 | 64.0 | 34.<br>5 | 31.3 | 5.1 | 4.3      | 7.0      | 4.8      | 42.<br>2 | 2.9      | 4.8      | 42.<br>2 | 2.9      |
| <b>W7</b>    | 74.<br>3 | 84.3 | 79.<br>7 | 59.5 | 39.<br>6 | 31.7 | 4.3 | 9.7      | 16.<br>0 | 3.2      | 25.<br>4 | 17.<br>8 | 3.2      | 25.<br>4 | 17.<br>8 |
| <b>W7-1</b>  | 77.<br>1 | 89.2 | 79.<br>0 | 67.9 | 47.<br>2 | 58.0 | 3.8 | 7.2      | 4.2      | 2.2      | 1.2      | 2.2      | 2.2      | 1.2      | 2.2      |
| <b>W8</b>    | 74.<br>6 | 87.9 | 78.<br>1 | 63.3 | 62.<br>9 | 57.7 | 4.3 | 5.5      | 5.7      | 2.8      | 1.5      | 2.4      | 2.8      | 1.5      | 2.4      |
| <b>W8-1</b>  | 73.<br>3 | 89.2 | 81.<br>6 | 61.8 | 43.<br>4 | 49.3 | 4.1 | 18.<br>0 | 4.8      | 3.2      | 4.2      | 2.7      | 3.2      | 4.2      | 2.7      |
| <b>W11</b>   | 89.<br>0 | 82.3 | 84.<br>7 | 70.6 | 41.<br>1 | 44.7 | 3.6 | 9.6      | 6.8      | 5.3      | 19.<br>1 | 20.<br>6 | 5.3      | 19.<br>1 | 20.<br>6 |
| <b>W11-1</b> | 89.<br>4 | 78.4 | 73.<br>0 | 54.3 | 42.<br>9 | 32.9 | 3.1 | 0.4      | 5.6      | 5.6      | 23.<br>3 | 25.<br>7 | 5.6      | 23.<br>3 | 25.<br>7 |
| <b>W12</b>   | 92.<br>3 | 83.4 | 85.<br>1 | 42.9 | 50.<br>5 | 59.7 | 3.4 | 6.4      | 4.0      | 37.<br>9 | 11.<br>3 | 6.3      | 37.<br>9 | 11.<br>3 | 6.3      |
| <b>W12-1</b> | 94.<br>0 | 85.2 | 88.<br>1 | 60.5 | 45.<br>8 | 59.6 | 7.4 | 14.<br>8 | 4.2      | 5.7      | 1.8      | 12.<br>3 | 5.7      | 1.8      | 12.<br>3 |
| <b>W13</b>   | 96.<br>9 | 77.5 | 81.<br>3 | 81.1 | 40.<br>8 | 69.2 | 4.0 | 6.8      | 2.5      | 3.2      | 21.<br>9 | 2.6      | 3.2      | 21.<br>9 | 2.6      |
| <b>W13-1</b> | 94.<br>0 | 98.7 | 85.<br>1 | 83.4 | 53.<br>7 | 67.1 | 3.0 | 15.<br>0 | 5.4      | 3.4      | 1.7      | 3.7      | 3.4      | 1.7      | 3.7      |
| <b>W14</b>   | 96.<br>9 | 94.5 | 79.<br>4 | 81.2 | 66.<br>3 | 20.9 | 1.7 | 1.7      | 1.1      | 2.4      | 8.7      | 4.5      | 2.4      | 8.7      | 4.5      |
| <b>W14-1</b> | 90.<br>3 | 98.9 | 86.<br>3 | 56.2 | 47.<br>5 | 39.9 | 6.6 | 2.3      | 3.1      | 13.<br>9 | 0.9      | 1.3      | 13.<br>9 | 0.9      | 1.3      |
| <b>W15</b>   | 90.<br>2 | 83.8 | 75.<br>1 | 74.2 | 48.<br>6 | 38.5 | 2.6 | 2.3      | 3.6      | 2.4      | 1.6      | 2.8      | 2.4      | 1.6      | 2.8      |
| <b>W15-1</b> | 89.<br>0 | 82.1 | 90.<br>0 | 74.1 | 58.<br>0 | 62.0 | 2.8 | 2.6      | 3.3      | 2.3      | 1.3      | 1.2      | 2.3      | 1.3      | 1.2      |
| <b>W16</b>   | 92.<br>8 | 71.7 | 80.<br>4 | 80.7 | 18.<br>6 | 69.6 | 0.1 | 11.<br>1 | 1.9      | 4.4      | 7.6      | 2.5      | 4.4      | 7.6      | 2.5      |
| <b>W16-1</b> | 89.<br>5 | 78.3 | 69.<br>5 | 36.9 | 29.<br>2 | 55.9 | 5.6 | 3.3      | 1.0      | 21.<br>6 | 1.6      | 0.5      | 21.<br>6 | 1.6      | 0.5      |
| <b>W17</b>   | 88.<br>9 | 70.3 | 76.<br>0 | 68.7 | 47.<br>0 | 16.5 | 3.5 | 4.1      | 2.8      | 4.9      | 11.<br>3 | 33.<br>4 | 4.9      | 11.<br>3 | 33.<br>4 |
| <b>W17-1</b> | 87.<br>5 | 75.0 | 82.<br>7 | 57.1 | 45.<br>8 | 72.0 | 3.7 | 5.5      | 2.2      | 1.9      | 4.3      | 3.3      | 1.9      | 4.3      | 3.3      |

---



**Table S6.** Soil mass water content (g) and soil volumetric water content (g<sup>3</sup>).

| Sub-Plot | Mass Water Content (g) |                  |                 | Volumetric Water Content (g <sup>3</sup> ) |                  |                 |
|----------|------------------------|------------------|-----------------|--------------------------------------------|------------------|-----------------|
|          | <u>Pre-Burn</u>        | <u>Post-Burn</u> | <u>Green-Up</u> | <u>Pre-Burn</u>                            | <u>Post-Burn</u> | <u>Green-Up</u> |
| 66.01    | 0.29                   | 0.28             | 0.34            | 0.34                                       | 0.25             | 0.33            |
| 66.01-2  | 0.24                   | 0.30             | 0.30            | 0.29                                       | 0.50             | 0.49            |
| 66.02    | 0.28                   | 0.26             | 0.24            | 0.30                                       | 0.34             | 0.42            |
| 66.02-2  | 0.28                   | 0.24             | 0.31            | 0.55                                       | 0.32             | 0.44            |
| 67.02-1  | 0.24                   | 0.27             | 0.33            | 0.37                                       | 0.40             | 0.44            |
| 67.02-2  | 0.38                   | 0.26             | 0.35            | 0.36                                       | 0.31             | 0.33            |
| 19.01    | 0.03                   | 0.14             | 0.09            | 0.04                                       | 0.12             | 0.09            |
| 19.01-2  | 0.03                   | 0.11             | 0.11            | 0.04                                       | 0.11             | 0.14            |
| W01      | 0.15                   | 0.14             | 0.05            | 0.21                                       | 0.22             | 0.05            |
| W01-1    | 0.13                   | 0.17             | 0.02            | 0.21                                       | 0.30             | 0.03            |
| W02      | 0.18                   | 0.19             | 0.05            | 0.23                                       | 0.24             | 0.04            |
| W02-1    | 0.15                   | 0.17             | 0.07            | 0.21                                       | 0.23             | 0.08            |
| W03      | 0.19                   | 0.90             | 0.03            | 0.27                                       | 0.82             | 0.03            |
| W03-1    | 0.17                   | 0.21             | 0.03            | 0.22                                       | 0.30             | 0.04            |
| W04      | 0.15                   | 0.26             | 0.03            | 0.17                                       | 0.26             | 0.03            |
| W04-1    | 0.16                   | 0.21             | 0.04            | 0.18                                       | 0.30             | 0.04            |
| W05.1    | 0.14                   | 0.20             | 0.00            | 0.21                                       | 0.27             | 0.00            |
| W0S.1-1  | 0.20                   | 0.21             | 0.04            | 0.30                                       | 0.21             | 0.05            |
| W5       | 0.17                   | 0.11             | 0.05            | 0.26                                       | 0.18             | 0.07            |
| W5-1     | 0.18                   | 0.22             | 0.03            | 0.25                                       | 0.25             | 0.04            |
| W7       | 0.17                   | 0.18             | 0.12            | 0.21                                       | 0.17             | 0.15            |
| W7-1     | 0.16                   | 0.16             | 0.03            | 0.24                                       | 0.27             | 0.05            |
| W8       | 0.15                   | 0.14             | 0.06            | 0.19                                       | 0.21             | 0.05            |
| W8-1     | 0.20                   | 0.22             | 0.07            | 0.24                                       | 0.20             | 0.08            |
| W11      | 0.06                   | 0.13             | 0.11            | 0.08                                       | 0.17             | 0.13            |
| W11-1    | 0.04                   | 0.12             | 0.10            | 0.04                                       | 0.17             | 0.13            |
| W12      | 0.07                   | 0.12             | 0.24            | 0.08                                       | 0.17             | 0.20            |
| W12-1    | 0.05                   | 0.09             | 0.21            | 0.06                                       | 0.14             | 0.20            |
| W13      | 0.06                   | 0.15             | 0.30            | 0.08                                       | 0.20             | 0.32            |
| W13-1    | 0.07                   | 0.10             | 0.27            | 0.08                                       | 0.12             | 0.25            |
| W14      | 0.04                   | 0.08             | 0.08            | 0.05                                       | 0.10             | 0.08            |

|       |       |      |      |       |      |      |
|-------|-------|------|------|-------|------|------|
| W14-1 | 0.06  | 0.09 | 0.09 | 0.06  | 0.10 | 0.17 |
| W15   | 0.06  | 0.13 | 0.11 | 0.08  | 0.18 | 0.16 |
| W15-1 | -0.95 | 0.13 | 0.08 | -1.15 | 0.19 | 0.08 |
| W16   | 0.04  | 0.12 | 0.18 | 0.05  | 0.17 | 0.23 |
| W16-1 | 0.03  | 0.09 | 0.20 | 0.05  | 0.11 | 0.24 |
| W17   | 0.05  | 0.11 | 0.10 | 0.06  | 0.16 | 0.14 |
| W17-1 | 0.04  | 0.13 | 0.18 | 0.06  | 0.18 | 0.23 |

**Table S7.** 0-horizon density, depth, and mass water content for each time frame. Pre= Pre-burn; Post= Post burn; G= Green-up.

| Subplot        | Density (g m <sup>3</sup> ) |       |       | Depth (cm) |      |      | Mass Water Content (g) |      |      |
|----------------|-----------------------------|-------|-------|------------|------|------|------------------------|------|------|
|                | Pre                         | Post  | G     | Pre        | Post | G    | Pre                    | Post | G    |
| <b>66.01</b>   | 5.50                        | 10.05 | 2.73  | 6.00       | 0.25 | 1.00 | 0.35                   | 0.63 | 0.20 |
| <b>66.01-2</b> | 6.92                        | 3.87  | 9.56  | 3.00       | 0.25 | 2.50 | 0.81                   | 0.39 | 0.80 |
| <b>66.02</b>   | 10.37                       | 3.19  | 3.71  | 4.00       | 0.25 | 0.50 | 0.63                   | 0.15 | 0.32 |
| <b>66.02-2</b> | 7.78                        | 2.07  | 2.51  | 3.00       | 0.10 | 0.50 | 0.24                   | 0.06 | 0.16 |
| <b>67.02-1</b> | 5.68                        | 9.76  | 18.98 | 3.50       | 0.25 | 2.50 | 1.41                   | 0.53 | 0.85 |
| <b>67.02-2</b> | 3.83                        | 6.14  | 2.48  | 3.00       | 0.25 | 1.00 | 1.84                   | 0.28 | 0.14 |
| <b>19.01</b>   | 9.90                        | 2.87  | 4.28  | 3.50       | 1.00 | 2.00 | 0.70                   | 0.38 | 0.32 |
| <b>19.01-2</b> | 8.52                        | 4.41  | 4.77  | 4.00       | 1.00 | 1.50 | 0.50                   | 0.20 | 0.17 |
| <b>W01</b>     | 6.10                        | 3.30  | 2.38  | 2.50       | 2.00 | 1.50 | 0.26                   | 0.32 | 0.08 |
| <b>W01-1</b>   | 10.27                       | 1.10  | 0.48  | 3.00       | 0.50 | 0.50 | 0.23                   | 0.35 | 0.23 |
| <b>W02</b>     | 5.06                        | 2.32  | 2.48  | 2.00       | 1.50 | 1.00 | 0.26                   | 0.35 | 0.15 |
| <b>W02-1</b>   | 2.23                        | 2.48  | 1.46  | 1.00       | 2.50 | 0.50 | 0.35                   | 0.43 | 0.18 |
| <b>W03</b>     | 6.20                        | 0.54  | 1.76  | 2.00       | 0.10 | 1.50 | 0.20                   | 0.55 | 0.18 |
| <b>W03-1</b>   | 5.06                        | 0.22  | 4.31  | 2.50       | 0.10 | 1.00 | 1.18                   | 0.53 | 0.70 |
| <b>W04</b>     | 2.23                        | 5.99  | 4.32  | 3.00       | 1.00 | 1.50 | 0.18                   | 0.15 | 0.16 |
| <b>W04-1</b>   | 11.58                       | 4.65  | 7.74  | 3.50       | 1.50 | 2.50 | 0.16                   | 0.39 | 0.18 |
| <b>W05.1</b>   | 5.88                        | 1.36  | 3.42  | 3.00       | 0.25 | 1.50 | 0.25                   | 0.25 | 0.16 |
| <b>W05.1-1</b> | 6.99                        | 3.88  | 5.04  | 2.50       | 0.25 | 2.00 | 0.20                   | 0.33 | 0.10 |
| <b>W5</b>      | 10.65                       | 2.36  | 2.31  | 3.00       | 1.50 | 1.50 | 0.21                   | 0.31 | 0.25 |
| <b>W5-1</b>    | 4.08                        | 3.70  | 2.39  | 1.00       | 1.00 | 1.50 | 0.15                   | 0.32 | 0.25 |
| <b>W7</b>      | 5.52                        | 2.52  | 1.51  | 2.00       | 0.50 | 1.00 | 0.37                   | 0.37 | 0.28 |
| <b>W7-1</b>    | 8.21                        | 0.22  | 1.10  | 3.00       | 0.25 | 0.50 | 0.33                   | 0.70 | 0.27 |
| <b>W8</b>      | 5.08                        | 2.90  | 2.96  | 1.00       | 1.00 | 1.00 | 0.21                   | 0.36 | 0.23 |
| <b>W8-1</b>    | 11.29                       | 3.74  | 8.89  | 3.00       | 1.00 | 2.00 | 0.16                   | 0.45 | 0.26 |
| <b>W11</b>     | 7.36                        | 5.85  | 5.89  | 1.25       | 0.50 | 3.00 | 0.13                   | 0.07 | 0.11 |
| <b>W11-1</b>   | 7.57                        | 4.18  | 3.20  | 1.50       | 0.50 | 1.00 | 0.13                   | 0.06 | 0.07 |
| <b>W12</b>     | 3.39                        | 4.42  | 5.78  | 0.25       | 0.25 | 2.00 | 0.09                   | 0.13 | 0.29 |
| <b>W12-1</b>   | 5.22                        | 3.08  | 6.13  | 1.25       | 0.50 | 2.00 | 0.10                   | 0.07 | 0.21 |
| <b>W13</b>     | 6.39                        | 7.03  | 3.67  | 0.75       | 1.00 | 0.50 | 0.14                   | 0.27 | 0.26 |

|              |       |      |       |      |      |      |      |      |      |
|--------------|-------|------|-------|------|------|------|------|------|------|
| <b>W13-1</b> | 3.93  | 7.59 | 3.43  | 0.50 | 3.00 | 2.50 | 0.11 | 0.08 | 0.24 |
| <b>W14</b>   | 7.26  | 8.31 | 3.82  | 3.50 | 1.50 | 1.00 | 0.17 | 0.07 | 0.10 |
| <b>W14-1</b> | 15.69 | 6.19 | 4.13  | 7.00 | 1.50 | 1.50 | 0.12 | 0.09 | 0.03 |
| <b>W15</b>   | 5.19  | 8.43 | 8.27  | 2.00 | 1.00 | 1.00 | 0.17 | 0.20 | 0.14 |
| <b>W15-1</b> | 5.08  | 8.16 | 2.31  | 3.50 | 1.75 | 0.25 | 0.14 | 0.10 | 0.07 |
| <b>W16</b>   | 2.50  | 6.08 | 3.54  | 0.75 | 1.00 | 1.00 | 0.07 | 0.12 | 0.22 |
| <b>W16-1</b> | 4.12  | 5.61 | 5.86  | 1.25 | 0.50 | 0.50 | 0.06 | 0.26 | 0.24 |
| <b>W17</b>   | 3.14  | 5.55 | 4.45  | 0.25 | 0.25 | 0.25 | 0.06 | 0.05 | 0.11 |
| <b>W17-1</b> | 4.33  | 3.22 | 10.19 | 0.25 | 0.25 | 0.25 | 0.05 | 0.03 | 0.26 |

---
